# Supplementary material
Source: PubMed Central journal article supplement (PMC4796946)
Supplement: NIHMS760070-supplement-Supp_Data_1.pdf [file NIHMS760070-supplement-Supp_Data_1.pdf]

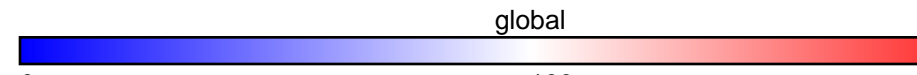

GPR45  
GPR65q  
GPR115  
GPR49S  
GPR49B  
GPR67S  
GPR67L  
GPR68S  
GPR68L  
GPR69S  
GPR69L  
GPR123q  
GPR123l  
GPR124  
GPR125  
GPR126  
GPR127  
GPR128  
GPR129  
GPR130  
GPR131  
GPR132  
GPR133  
GPR134  
GPR135  
GPR136  
GPR137  
GPR138  
GPR139  
GPR140  
GPR141  
GPR142  
GPR143  
GPR144  
GPR145  
GPR146  
GPR147  
GPR148  
GPR149  
GPR150  
GPR151  
GPR152  
GPR153  
GPR154  
GPR155  
GPR156  
GPR157  
GPR158  
GPR159  
GPR160  
GPR161  
GPR162  
GPR163  
GPR164  
GPR165  
GPR166  
GPR167  
GPR168  
GPR169  
GPR170  
GPR171  
GPR172  
GPR173  
GPR174  
GPR175  
GPR176  
GPR177  
GPR178  
GPR179  
GPR180  
GPR181  
GPR182  
GPR183  
GPR184  
GPR185  
GPR186  
GPR187  
GPR188  
GPR189  
GPR190  
GPR191  
GPR192  
GPR193  
GPR194  
GPR195  
GPR196  
GPR197  
GPR198  
GPR199  
GPR200

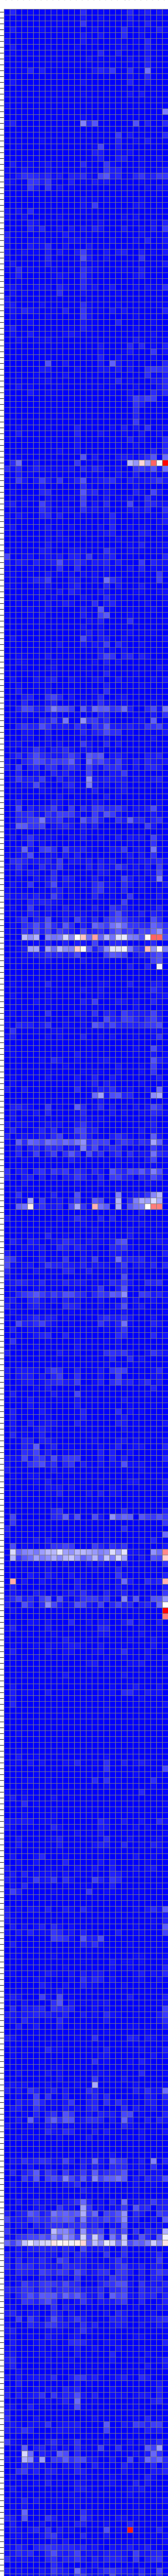

Compound name  
Pilocarpine hydrochloride  
Urapidil hydrochloride  
Prazosin  
"Benzeneethanamine, N.alpha.-dimethyl-N-2-propylvinyl-(R)-"  
Bucrine  
"Glicine, N-[2-[(acetilythio)methyl]-1-oxo-3-phenylpropyl]-phenylmethyl ester"  
"4-Thiazolinecarboxylic acid, 2-oxo-, (R)-"  
Amlodipine base  
"Benzeneacetonitrile, alpha-[3-[2-(3,4-dimethoxyphenyl)ethyl]methylamino]propyl-3,4-dimethoxy-alpha-(1-methyl)ethyl-, (R)-"  
Capsaicin  
Procycladine E1  
AM 404  
Nicotinic acid  
Riluzole  
Amsulinate  
"Benzenesulfonic acid, 2-[(2,6-dichlorophenyl)amino]-, monosodium salt"  
Efavirenz  
5-hydroxytryptamine  
CGS 15943  
Amiodarone hydrochloride  
"3-[3,5-dibromo-4-hydroxybenzoyl]-2-ethylbenzofuran"  
Temozolamide  
Anagrelide hydrochloride  
"Oxirane-2-carboxylic acid, 2-[6-(4-chlorophenoxy)hexyl]-, ethyl ester-"  
Valdecoxib  
Oxvalerium bromide  
Zacopride  
Loxapine succinate  
Azalastine hydrochloride  
Actarit  
Pemoline  
Phenprobamate  
Mianserin hydrochloride  
Carvedilol  
Zolmitriptan  
Tremulacin  
Arisaric acid  
Zafirlukast  
Roxatidine acetate hydrochloride  
Dabromipheniramine maleate  
Lofexidine hydrochloride  
Isosuladine maleate  
Micoltil  
Levamisole  
Nobletin  
Finasteride  
Naproxen sodium  
Benzazepil hydrochloride  
"Guanidine, N-cyano-N-(1,1-dimethylpropyl)-N'-3-pyridinyl-"  
Rofarur  
CCPA  
Rifabutin  
"2',3'-dideoxycytidine"  
"6H-Pyridol[2,3-b]1,4-benzodiazepin-6-one, 11-[2-[(diethylamino)methyl]-1-piperidinyl]acetyl-5,11-dihydro-"  
Montelukast sodium  
"SR 57,227A"  
Losartan potassium  
Levonorgestrel  
Cetuximab hydrochloride  
Itraconazole  
Rosiglitazone hydrochloride  
R(+)-SCH-23390 hydrochloride  
Fenoldopam mesylate  
CGS 12066B  
Nicotinic acid  
Lofepamine  
Terbinafine hydrochloride  
"3-hydroxy-1,2-dimethyl-4(1H)-pyridone"  
Valsartan citrate  
Vardenafil citrate  
Diazepam  
Rimacizumab  
Onesartan medoxomil  
Icarin  
"8-Chloro-11-piperidin-4-ylidene-6,11-dihydro-5H-benzo[5,6]cyclohepta[1,2-b]pyridine"  
Toremifene citrate  
Fluphenazine hydrochloride  
HT MT  
Bitemelane  
Cisapride  
Escitalopram oxalate  
Trazodone hydrochloride  
Naltrexone  
1-benzylimidazole  
(+)-Vesamicol hydrochloride  
Rosuvastatin calcium  
Amfebutamone hydrochloride  
Zolpidem tartrate  
Pilocarpine hydrochloride  
Viramidine  
d-3-Methoxy-N-methylmorphinan hydrobromide  
Duloxetine  
Beslistin  
Cosserelin acetate  
Lamotrigine  
Tosufloxacin tosylate  
Mecillinam  
Xanthinol nicotinate  
Tinidazole  
Cefactor  
Naloxone  
Fenpiverinium bromide  
Cefatrizine propylene glycol  
Lomyliline  
Pravastatin sodium  
Etoposide  
Doxapram hydrochloride  
Modafinil  
Zaleplon  
"1H-Indole-2-propanoic acid, 1-[4-(chlorophenyl)methyl]-3-[(1,1-dimethylethyl)thio]-alpha.alpha.-dimethyl-5-(1-methyl)ethyl-"  
Nicorandil  
Delta-1-hydrocortisone 21-hemisuccinate sodium salt  
Benacyzine hydrochloride  
Maltol  
Roxivacaine hydrochloride  
19-Nortestosterone  
Dichloroacetic acid  
"1H-Imidazole-5-carboxylic acid, 1-(1-phenylethyl)-, ethyl ester, (R)-"  
Diazoxide  
Kilastamycin  
Rosiglitazone maleate  
Tegaserod  
Nimetazepam  
"Thiophene, 5-bromo-2-(4-fluorophenyl)-3-[4-(methylsulfonyl)phenyl]-"  
Indomethacin  
Prampixole  
5-Amino-2-hydroxybenzoic acid  
Pizotiline  
beta-estradiol  
(-)-Cotinine  
Lidocaine  
ethynylestradiol  
Methylandrostenediol  
Ethinylestradiol  
Stripentol  
Stanozolol  
Loratadine  
Pantoprazole sodium salt  
Ipriflavone  
3'-deoxyadenosine  
AM-251  
Cyproheptadine hydrochloride  
Lacidipine  
Famotidine  
Salbutamol sulfate  
Telmisartan  
Haloperidol  
Levofloxacin  
Enrofloxacin  
Troloxide  
Tibolone  
Mastiline HCl  
Nefazodone  
Methyltestosterone  
Alsetron hydrochloride  
Perorsone hydrochloride  
Artesunate  
Mestanolone  
Tacrolimus  
Oxymetholone  
Mesoridazine  
"3[2H]-Pyridazinone, 6-[4-(difluoromethoxy)-3-methoxyphenyl]-"  
Bifonazole  
6-Azauridine  
Topiramate  
Ripirram  
Triptolide  
"1H-Imidazol-2-amine, N-(2,6-dichlorophenyl)-4,5-dihydro-"  
6-Aminoindazole  
"9-Azabicyclo[3.3.1]nonane-7,9-dione, 8-[2-[(2,3-dihydro-1,4-benzodioxin-2-yl)methyl]amino]ethyl-, monomethanesulfonate"  
"Adenosine, N-(2-hydroxycyclopropyl)-, (1S-trans)-"  
Atracurium besylate  
Picrotin - Picrotoxinin  
Terazosin  
Nifedipine  
Roflitalacryline  
Ormetoprim  
Quinestrol hemifumarate  
Droperidol  
Pentoxifylline  
Atomoxetine hydrochloride  
Raltitrexed  
Dactinomycin  
Ebselen  
Mevastatin  
Nalbuphine  
Raclopride  
Stavudine  
Acarbose  
Moxonidine hydrochloride  
Alprazolam  
Imatinib mesylate  
SDM25N  
diphenhydramine hydrochloride  
5-Methoxytryptamine  
Latanoprost  
Diphenoxylate  
Ritonavir  
Tripletal  
2-chloro-2'-deoxyadenosine  
Ketoconazole  
Clotazimine  
Antismith  
RU 24969  
Vinorelbine bitartrate  
Nimodipine  
Granisetron hydrochloride  
Nialamide  
TFMPP  
Docetaxel  
Sumatriptan succinate  
Lomerizine dihydrochloride  
Benpropipine phosphate  
"2[1H]-Pyrimidinone, 4-amino-1-beta-D-arabinofuranosyl-"  
PD 81723  
Bicalutamide  
Indinavir sulfate  
Midazolam hydrochloride  
Ornidazole  
"1,1-dimethyl-4-phenylpiperazinium iodide"  
3-Pyridinemethanol  
Trospirone hydrochloride  
Ranolazine dihydrochloride  
2-(2-aminophenyl)pyridine  
Vasocarium bromide  
Doxepin  
Minacipran  
Calcipotriol  
Pentoxifylline  
Piroxicam  
Cephalixin monohydrate  
Levosulpiride  
Ticlopidine hydrochloride  
Enalaprilat  
Cefdinir  
Balsalazir  
Olopatadine hydrochloride  
"Benzenesulfonic acid, alpha-(hydroxymethyl)-, 9-methyl-3-oxa-9-azatricyclo[3.3.1.0,2,4]non-7-yl ester, [7(S)-1(alpha,2beta,4bet...  
SKF 83566  
Cisamec trihydrate  
Venlafaxine hydrochloride  
Fluticasone propionate  
Corticosterone  
Sulfasalazine  
Torasemide  
Procarrbazone hydrochloride  
Lamivudine  
Ampropricam  
Orlistat  
7-Nitroindazole  
Mesivacaine hydrochloride  
SB 205607  
Clotrimazole  
Tetraethylthiuram disulfide  
Idarubicin hydrochloride  
Epirubicin hydrochloride  
Doxorubicin hydrochloride  
"L-Glutamic acid, N-[4-[(2,4-diamino-6-pteridinyl)methyl]methylamino]benzoyl-"  
Serraline  
Donepezil  
"L-Ornithine, N5-[imino(methylamino)methyl]"  
"1H-Indol-2-one, 1,3-dihydro-1-phenyl-3,3-bis(4-pyridinyl)methyl-"  
"9-amino-1,2,3,4-tetrahydroquinoline hydrochloride"  
LY 171883  
Anastrozole  
Beclometasone  
Progesterone  
Bulfinmedil hydrochloride  
Idarubicin  
"10H-Phenothiazine, 2-chloro-10-[3-(4-methyl-1-piperazinyl)propyl]-"  
Pidotimod  
Lorazepam  
Dehydroepiandrosterone  
Galanthamine  
Tocainide  
Glimperidone  
"N,N'-dicyclopentyl-1,6-diaminohexane"  
Mirtazapine  
(+)-3-hydroxy-N-methylmorphinan D-tartrate  
Tasapalene hydrochloride  
"2',3'-dideoxyinosine"  
Resveratrol  
Milrinone  
Valsartan  
Meropenem  
Ondansetron hydrochloride  
Mifepristone  
Ezetimibe  
Oxaprozin  
Nitazoxanide  
Fluxvastatin calcium  
5-Fluorouracil  
Nisoldipine  
Honokiol  
Carmofur  
Oxiconazole nitrate  
D-cycloserine  
Lobeline hydrochloride  
Galxibate mesylate  
"L-694,247"  
Chlorpheniramine  
Secobarbital  
Crotamiton  
Letrozole  
Esmolol hydrochloride  
Metronidazole  
Levocetirizine  
Ramipril  
Taxifolin(+/-)  
Sibutramine  
Citalopram hydrobromide  
Glycopyrrolate  
Formoterol fumarate dihydrate  
Zileuton  
Megestrol acetate  
Pramipexole hydrochloride  
Nifedipine hydrochloride  
Taxifolin(+)  
Desoximetasone  
Fluvoxamine  
Cianthromycin  
Salmeterol  
Aripiprazole  
Linciclid  
Dolasetron mesylate  
Nitrazepam  
Inotocan hydrochloride trihydrate  
Idesabenone  
Ciclastin sodium  
Triclabendazole  
Clanzapine  
Ergometrin  
Irbesartan  
Palonosetron hydrochloride  
Ritachestins substance S  
Flurbiprofen  
Duloxetine hydrochloride  
"Benzofuranthiindole-10,11-diol, 5,6,7,8,12b-hexahydro-, trans-"  
Pefloxacin mesylate  
1-(2-Methyl-5-nitroimidazol-1-yl)propan-2-ol  
Dexchlorpheniramine maleate  
Tegaserod maleate  
Synephrine  
Paroxetine  
Tadalafil  
Risperidone  
Dofetilide  
Repaclidine  
Torsimide  
Ketofen fumarate  
5-fluoro-2-pyrimidone  
Pericardide mesylate salt  
Trifluoperazine dihydrochloride  
Paroxetine  
Tripletalaminium hydrochloride  
"Benzofuranthiindole-10,11-diol, 5,6,7,8,12b-hexahydro-, trans-"  
Herpizidil  
Piribedil  
Alfuzosin  
Moxifloxacin hydrochloride  
Pancuronium  
Voriconazole  
Cefixime sodium  
Ceftriaxone proxitil  
Famciclovir  
Nefinavir mesylate  
"4-Sulapil hydrochloride"  
Rufloxacin hydrochloride  
Azasetron  
GR 89696  
Mesoridazine  
Benidipine hydrochloride  
Olopatadine C  
Flubendazole  
Pimozide  
Homoveratrylamine  
Rifampin  
Mefenoxolone  
Telithromycin  
Picidil  
4-Chloro-N-(2-morpholin-4-yl-ethyl)-benzamide  
Nafopidil  
Bupropion hydrochloride  
Calcitriol  
Pacifloxacin  
Topotecan hydrochloride  
Medroxyprogesterone  
Homocarnitine  
Valacyclovir hydrochloride  
Vincristine sulfate  
Vindesine sulfate  
Cisapride  
Hupezine A  
Sibutramine hydrochloride  
Mefenoxolone  
Pantocorin sodium  
Nateglinide  
Penciclovir  
Loxoprofen sodium  
Fencamfene  
Tryptoline  
Zeranol  
Amlexanox  
Nafadotride  
Doxylamine succinate  
Betaxolol hydrochloride  
Eniposulfon sodium salt  
Bisoprolol fumarate  
Tolterodine tartrate  
Isosuladine maleate  
Diphenylcyclopropenone  
Rutin  
Esomeprazole magnesium  
Onasemnogene  
Lansoprazole  
Lofexidine hydrochloride  
Rabeprazole  
Trimetazidine maleate  
Tranilast  
Isradipine  
"1,3,5(10)-Estratrien-3-ol-17-one sulphate, sodium salt"  
Oxazepam hydrochloride  
Hyperoside  
Flumazenil  
"2H-Indol-2-one, 1,3-dihydro-1-phenyl-3,3-bis(4-pyridinyl)methyl-"  
Phenelzine sulfate salt  
Halometasone monohydrate  
Cinacalcin  
Pincacillin monohydrate  
Dehydrocholic acid  
Rizatriptan benzoate  
Homocarnitine  
Phenothiazine  
Nitrendipine  
Saquevirin mesylate  
Tramadol  
Chlordiazepoxide  
Phyostigmine  
"Acetamide, 2-amino-N-(1-methyl-1,2-diphenylethyl)-, (+)-"  
2-Chloroacetamide  
"Methanesulfonamide, N-[4-[1-(2-[2-(2-methyl-2-pyridinyl)ethyl]-4-piperidinyl)carbonyl]phenyl]-, dihydrochloride"  
Cortisone
